# Supplementary material
Source: PubMed Central journal article supplement (PMC2634930)
Supplement: 0808044105_0808044105SI.pdf [file 0808044105_0808044105SI.pdf]

# Supporting Information

Wei et al. 10.1073/pnas.0808044105

## SI Materials and Methods

**Scanning Electron Microscopy (SEM) and Transmission Electron Microscopy (TEM).** The lateral wall of the LV was dissected then fixed with 2.5% glutaraldehyde and 2% paraformaldehyde. For SEM, samples were dehydrated, critical point dried and infiltrated with gradient hexamethyldisilazane, then mounted on stubs and sputter coated with gold-palladium. Images were collected on a Philips FEI XL30 SEM. For TEM, samples were postfixed in 1% osmium tetroxide, dehydrated, infiltrated, and polymerized. Ultrathin sections were post-stained. Images were taken on a Philips EM400 TEM with a MegaView digital camera (Soft Imaging Systems, Inc.).

**Immunohistochemistry.** Cultures were fixed with 4% paraformaldehyde in PBS (PBS) for 20 min, then rinsed and immunostained with antibodies directed against mouse and rabbit anti- $\beta$  tubulin III (Tuj1) (BAbc), mouse anti-neurofilament 200 (Sigma), mouse anti-NeuN (Chemicon), mouse anti-synapsin 1 (SY), rabbit anti-gial fibrillary acidic protein (GFAP) (DAKO), mouse anti-gial fibrillary acidic protein (Chemicon), rabbit anti-myosin VIIA and myosin VI (*Proteus Biosciences*), mouse anti-CtBP2 (BD), chicken anti-GFP (Chemicon) and rat anti-BrdU (Accurate Chemical & Scientific Corporation), following standard protocols. Immunostaining was visualized with secondary antibodies conjugated to Cy3, Cy5, or Alexa Fluor 488, 548, or 647 fluorophores. Regular immunohistochemistry staining followed biotin-streptavidin-diaminobenzidine protocols. Omission of the primary antibodies eliminated staining in all preparations examined. The nucleus was counterstained with DAPI. A Zeiss LSM 510 Meta confocal microscope or an Olympus fluorescent microscope equipped with a digital camera was used to collect images. Imaris Bitplane software was used to generate 3D reconstructions of confocal Z-stack images.

**BrdU Administration and Immunofluorescence.** To demonstrate the *in vivo* proliferation of ependymal cells, BrdU (100 mg/kg in 0.9% NaCl) was injected i.p. into C57BL/6j mice (8–10 weeks old, Charles River) once a day for 30 days before sacrifice. Animals were then anesthetized and killed by cervical dislocation, whereafter their brains were flash-frozen with dry ice and then cryosectioned. For the *in vitro* proliferation test of ependy-

mal cells, BrdU was added to the culture medium 48 h after initial culture (5  $\mu$ M) and was maintained for 72 h. BrdU and myosin VIIA double staining followed the protocol as described<sup>5</sup>. Omission of the primary antibodies eliminated staining. Double-labeled ependymal cells were confirmed by serial confocal sectioning.

**Assay for Mechanosensory Transduction in Ependymal Cells.** Animals were killed by cervical dislocation then the lateral wall of LV was exposed to 5  $\mu$ M FM1–43FX (Molecular Probes) for 60 s and fixed with 4% formaldehyde. A thin layer of the lateral wall was dissected and mounted to examine the fluorescent intensity to determine dye uptake. To block the entry of FM1–43, the lateral ventricle was preincubated and repeatedly flushed with DHS for 4 min.

**Electrophysiology.** Hair cells were identified by the presence of green fluorescence under UV light. NSC-derived neurons were identified by their distinct neuronal morphology of a small, round and phase bright cell body with long uneven processes. Spiral ganglion neurons were identified by their much larger round and phase bright cell bodies and unipolar and/or bipolar neurites. The criteria were confirmed by immunostaining in parallel cultures.

Currents were amplified with an Axopatch 200B amplifier (Axon Instruments) and filtered at a frequency of 2–5 kHz through a low-pass Bessel filter. The data were digitized at 5–500 kHz using an analog-to-digital converter (Digidata 1200; Axon Instruments). The sampling frequency was determined by the protocols used. Action potentials were amplified (100 $\times$ ), filtered (bandpass 2–10 KHz), and digitized at 5–500 kHz using the Digidata 1200 as described earlier. The extracellular solution for most experiments contained (in mM) NaCl 145, KCl 6, MgCl<sub>2</sub> 1, CaCl<sub>2</sub> 0–2, D-glucose 10, and Hepes 10, at pH 7.3. For perforated patch experiments, the tips of the pipettes were filled with an internal solution containing (in mM): KCl 150, Hepes 10, and D-glucose 10, at pH 7.3. The pipettes were front-filled with the internal solution and back-filled with the same solution containing 250  $\mu$ g/ml amphotericin. Stock solutions were reconstituted and perfused in the recording chamber. CNQX (5  $\mu$ M) was used to block AMPA receptors.

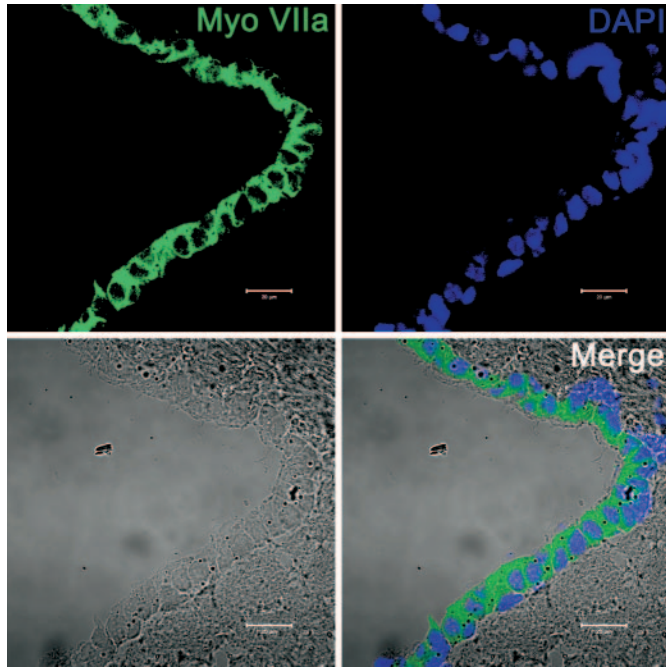

**Fig. S1.** Adult brain ependymal cells take the shape of polarized columnar epithelial cells and express myosin VIIA. (Scale bar, 20  $\mu\text{m}$ .)

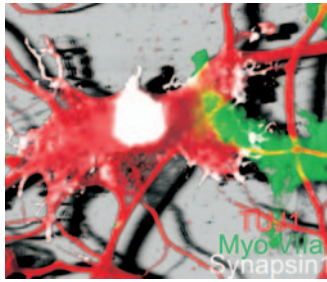

**Fig. S2.** Accumulation of synapsin 1 at the nerve fibers focused around the ependymal cells revealed that contacts among SGNs and ependymal cells have the potential to develop into synapses. Shown is an enlarged region of Fig. 4A2, depicting the accumulation of synapsin 1 at the adult SGN nerve endings. (Scale bar, 20  $\mu\text{m}$ .)



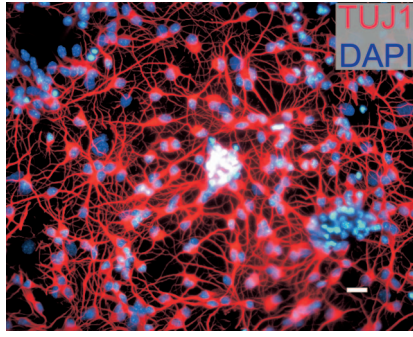

Fig. S4. Neuronal differentiation of adult NSCs. (Scale bar, 20  $\mu\text{m}$ .)



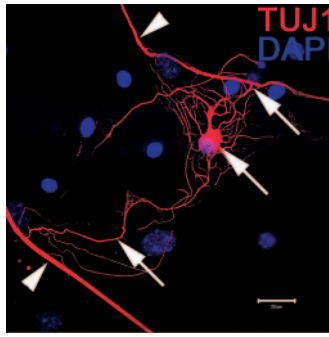

**Fig. S6.** Example of NSC-derived neuron serving as an interneuron between SGNs. The neurite of a NSC derived neuron (arrows) projected to and linked the neurites of two deafferentated SGNs (arrowhead). (Scale bar, 20  $\mu\text{m}$ .)
